# Supplementary material
Source: HighWire-hosted journal article supplement (https://rapm.bmj.com/content/47/4/263)
Supplement: inline-supplementary-material-1 [file inline-supplementary-material-1.pdf]

**Table S1** Literature search criteria

| Date       | Database                                                   | Search Terms                                                                                                                                                                                                                                                                                                                                                                                                                                                                                                                                                |
|------------|------------------------------------------------------------|-------------------------------------------------------------------------------------------------------------------------------------------------------------------------------------------------------------------------------------------------------------------------------------------------------------------------------------------------------------------------------------------------------------------------------------------------------------------------------------------------------------------------------------------------------------|
| 17.11.2020 | Embase<br>(Ovid)                                           | 1. Pain, Postoperative/<br>2. postoperative or post-operative or post-operat* or postoperat* or "after operat*" or "follow* operat*"<br>3. postsurgical or post-surgical or post-surg* or postsurg* or "after surg*" or "follow* surg*"<br>4. 2 or 3<br>5. pain* or discomfort or analgesi*<br>6. 4 and 5<br>7. 1 or 6<br>8. chronic* or constant* or continu* or persist* or longterm or long-term or longstanding or long-standing or long lasting or longlasting<br>9. 7 and 8<br>10. 9 and 2010:2020.(sa_year).<br>11. Meta analysis/<br>12. 10 and 11  |
| 19.07.2021 | MEDLINE<br>(Ovid)                                          | 1. Pain, Postoperative/<br>2. postoperative or post-operative or post-operat* or postoperat* or "after operat*" or "follow* operat*"<br>3. postsurgical or post-surgical or post-surg* or postsurg* or "after surg*" or "follow* surg*"<br>4. 2 or 3<br>5. (pain* or discomfort or analgesi*<br>6. 4 and 5<br>7. 1 or 6<br>8. chronic* or constant* or continu* or persist* or longterm or long-term or longstanding or long-standing or long lasting or longlasting<br>9. 7 and 8<br>10. 9 and 2010:2020.(sa_year).<br>11. Meta-Analysis/<br>12. 10 and 11 |
| 19.07.2021 | Cochrane<br>Database of<br>Systematic<br>Reviews<br>(Ovid) | 1. Pain, Postoperative<br>2. postoperative or post-operative or post-operat* or postoperat* or "after operat*" or "follow* operat*"<br>3. postsurgical or post-surgical or post-surg* or postsurg* or "after surg*" or "follow* surg*"<br>4. 2 or 3<br>5. (pain* or discomfort or analgesi*<br>6. 4 and 5<br>7. 1 or 6<br>8. chronic* or constant* or continu* or persist* or longterm or long-term or longstanding or long-standing or long lasting or longlasting<br>9. 7 and 8<br>10. 9 and 2010:2020.(sa_year).<br>11. Meta-Analysis/<br>12. 10 and 11  |

**Table S2** Full-text exclusions

| Study title                                                                                                                                                                     | Author, year     | Reason for exclusion         |
|---------------------------------------------------------------------------------------------------------------------------------------------------------------------------------|------------------|------------------------------|
| Local anaesthetics and regional anaesthesia for preventing chronic pain after surgery.                                                                                          | Andreae, 2012    | Wrong intervention           |
| Efficacy of Intraoperative Dexmedetomidine Compared with Placebo for Postoperative Pain Management: A Meta-Analysis of Published Studies                                        | Bellon, 2016     | Pediatric population         |
| Effect of perioperative systemic alpha2 agonists on postoperative morphine consumption and pain intensity: systematic review and meta-analysis of randomized controlled trials. | Blaudszun, 2012  | Did not examine chronic pain |
| Pharmacotherapy for the prevention of chronic pain after surgery                                                                                                                | Chaparro, 2012   | Conference abstract          |
| Effect of Perioperative Vitamin C Supplementation on Postoperative Pain and the Incidence of Chronic Regional Pain Syndrome: A Systematic Review and Meta-Analysis.             | Chen, 2016       | Wrong outcomes               |
| The efficiency and safety of steroid addition to multimodal cocktail periarticular injection in knee joint arthroplasty: a meta-analysis of randomized controlled trials        | Deng, 2019       | Did not examine chronic pain |
| Perioperative single dose systemic dexamethasone for postoperative pain: a meta-analysis of randomized controlled trials.                                                       | DeOliveira, 2011 | Did not examine chronic pain |
| Single dose oral celecoxib for acute postoperative pain in adults.                                                                                                              | Derry, 2013      | Did not examine chronic pain |
| Preoperative gabapentin for postoperative pain in orthopaedic surgery: Systematic review, meta-analysis and meta-regression                                                     | Doleman, 2015    | Conference abstract          |
| Pharmacological interventions for the prevention of acute postoperative pain in adults following brain surgery.                                                                 | Galvin, 2019     | Did not examine chronic pain |
| Single dose oral ketoprofen or dexketoprofen for acute postoperative pain in adults                                                                                             | Gaskell, 2017    | Did not examine chronic pain |
| Intra-articular lidocaine versus intravenous analgesia and sedation for manual closed reduction of acute anterior shoulder dislocation: an updated meta-analysis.               | Jiang, 2014      | Wrong outcomes               |
| The effects of continuous intravenous infusion of dexmedetomidine and remifentanyl on postoperative pain: A systematic review and meta-analysis                                 | Jin, 2019        | Did not examine chronic pain |
| Interventions to reduce shoulder pain following gynaecological laparoscopic procedures                                                                                          | Kaloo, 2019      | Wrong intervention           |
| Continuous intravenous perioperative lidocaine infusion for postoperative pain and recovery.                                                                                    | Kranke, 2015     | Did not examine chronic pain |
| The efficacy and safety of dexamethasone for pain management after total knee arthroplasty: A systematic review and meta-analysis.                                              | Li, 2018         | Did not examine chronic pain |
| The efficiency and safety of dexamethasone for pain control in total joint arthroplasty: A meta-analysis of randomized controlled trials.                                       | Meng, 2017       | Did not examine chronic pain |

|                                                                                                                                                                                      |                 |                              |
|--------------------------------------------------------------------------------------------------------------------------------------------------------------------------------------|-----------------|------------------------------|
| Perioperative adjuvant corticosteroids for post-operative analgesia in elective knee surgery - A systematic review                                                                   | Mohammad, 2017  | Did not examine chronic pain |
| The efficacy and safety of first-line therapies for preventing chronic post-surgical pain: A network meta-analysis                                                                   | Ning, 2018      | Wrong outcomes               |
| Perioperative Ketamine for Analgesia in Spine Surgery: A Meta-analysis of Randomized Controlled Trials.                                                                              | Pendi, 2018     | Did not examine chronic pain |
| Peri-operative steroids reduce pain, inflammatory response and hospitalisation length following knee arthroplasty without increased risk of acute complications: a meta-analysis     | Previtali, 2019 | Did not examine chronic pain |
| Is intraoperative dexmedetomidine a new option for postoperative pain treatment? A meta-analysis of randomized controlled trials.                                                    | Schnabel, 2013  | Did not examine chronic pain |
| Perioperative systemic lidocaine for postoperative analgesia and recovery after abdominal surgery: A meta-analysis of randomized controlled trials                                   | Sun, 2012       | Did not examine chronic pain |
| Lidocaine for preventing postoperative sore throat                                                                                                                                   | Tanaka, 2015    | Did not examine chronic pain |
| Perioperative use of gabapentinoids for the management of postoperative pain: A systematic review & meta-analysis                                                                    | Verret, 2018    | Conference abstract          |
| Efficacy and safety of intravenous lidocaine for postoperative analgesia and recovery after surgery: a systematic review with trial sequential analysis.                             | Weibel, 2016    | Did not examine chronic pain |
| Continuous intravenous perioperative lidocaine infusion for postoperative pain and recovery in adults                                                                                | Weibel, 2018    | Did not examine chronic pain |
| The effectiveness of interventions for preventing chronic pain after total knee replacement: Systematic review and meta-analysis                                                     | Wylde, 2020     | Conference abstract          |
| The efficacy of pregabalin for the management of acute and chronic postoperative pain in thoracotomy: A meta-analysis with trial sequential analysis of randomized-controlled trials | Yu, 2019        | Wrong outcomes               |

**Table S3** Item descriptions for the AMSTAR 2 critical appraisal tool for systematic reviews

| Item No. | Item                                                                                                                                                                                                            |
|----------|-----------------------------------------------------------------------------------------------------------------------------------------------------------------------------------------------------------------|
| 1.       | Did the research questions and inclusion criteria for the review include the components of PICO?                                                                                                                |
| 2.       | Did the report of the review contain an explicit statement that the review methods were established prior to the conduct of the review and did the report justify any significant deviations from the protocol? |
| 3.       | Did the review authors explain their selection of the study designs for inclusion in the review?                                                                                                                |
| 4.       | Did the review authors use a comprehensive literature search strategy?                                                                                                                                          |
| 5.       | Did the review authors perform study selection in duplicate?                                                                                                                                                    |
| 6.       | Did the review authors perform data extraction in duplicate?                                                                                                                                                    |
| 7.       | Did the review authors provide a list of excluded studies and justify the exclusions?                                                                                                                           |
| 8.       | Did the review authors describe the included studies in adequate detail?                                                                                                                                        |
| 9.       | Did the review authors use a satisfactory technique for assessing the risk of bias (RoB) in individual studies that were included in the review?                                                                |
| 10.      | Did the review authors report on the sources of funding for the studies included in the review?                                                                                                                 |
| 11.      | If meta-analysis was performed, did the review authors use appropriate methods for statistical combination of results?                                                                                          |
| 12.      | If meta-analysis was performed, did the review authors assess the potential impact of RoB in individual studies on the results of the meta-analysis or other evidence synthesis?                                |
| 13.      | Did the review authors account for RoB in primary studies when interpreting/discussing the results of the review?                                                                                               |
| 14.      | Did the review authors provide a satisfactory explanation for, and discussion of, any heterogeneity observed in the results of the review?                                                                      |
| 15.      | If they performed quantitative synthesis did the review authors carry out an adequate investigation of publication bias (small study bias) and discuss its likely impact on the results of the review?          |
| 16.      | Did the review authors report any potential sources of conflict of interest, including any funding they received for conducting the review?                                                                     |

**Table S4** AMSTAR 2 critical appraisal tool for systematic reviews

|                | Item No. |             |     |             |     |     |             |             |     |     |     |     |     |     |     |     |                |
|----------------|----------|-------------|-----|-------------|-----|-----|-------------|-------------|-----|-----|-----|-----|-----|-----|-----|-----|----------------|
| Study          | 1        | 2           | 3   | 4           | 5   | 6   | 7           | 8           | 9   | 10  | 11  | 12  | 13  | 14  | 15  | 16  | Quality        |
| Bailey, 2018   | Yes      | Yes         | No  | Partial Yes | Yes | Yes | Yes         | Yes         | Yes | No  | Yes | Yes | Yes | Yes | Yes | Yes | Moderate       |
| Bi, 2020       | Yes      | No          | No  | Partial Yes | Yes | Yes | No          | Yes         | Yes | No  | Yes | No  | No  | Yes | Yes | Yes | Critically low |
| Carley, 2021   | Yes      | Yes         | Yes | Yes         | Yes | Yes | Yes         | Yes         | Yes | Yes | Yes | Yes | Yes | Yes | No  | Yes | Low            |
| Chang, 2017    | No       | No          | No  | Partial Yes | No  | Yes | Partial Yes | Yes         | Yes | Yes | Yes | Yes | Yes | Yes | Yes | Yes | Low            |
| Chang, 2020    | Yes      | Partial Yes | No  | Yes         | Yes | Yes | Partial Yes | Yes         | Yes | No  | Yes | Yes | Yes | Yes | No  | Yes | Low            |
| Chaparro, 2013 | Yes      | Partial Yes | No  | Partial Yes | Yes | Yes | Yes         | Yes         | Yes | No  | Yes | Yes | Yes | Yes | No  | Yes | Low            |
| Clarke, 2012   | Yes      | No          | No  | Partial Yes | Yes | Yes | No          | Yes         | Yes | No  | Yes | No  | Yes | Yes | Yes | Yes | Critically low |
| Hamilton, 2016 | Yes      | Yes         | No  | Yes         | Yes | Yes | No          | Yes         | Yes | Yes | Yes | Yes | Yes | No  | No  | Yes | Critically low |
| Jiang, 2018    | Yes      | No          | No  | Partial Yes | Yes | Yes | Yes         | Yes         | Yes | No  | Yes | Yes | Yes | Yes | Yes | Yes | Low            |
| Klatt, 2015    | Yes      | Partial Yes | Yes | Partial Yes | No  | Yes | Partial Yes | Yes         | No  | No  | Yes | No  | No  | Yes | Yes | Yes | Critically low |
| Lepot, 2020    | Yes      | Yes         | No  | Partial Yes | Yes | No  | No          | Partial Yes | Yes | No  | Yes | No  | Yes | Yes | No  | Yes | Critically low |
| Martinez, 2017 | No       | Yes         | No  | Yes         | Yes | Yes | Partial Yes | Yes         | Yes | Yes | Yes | Yes | Yes | Yes | No  | Yes | Low            |
| McNicol, 2014  | Yes      | No          | No  | Partial Yes | No  | Yes | Partial Yes | Yes         | Yes | No  | Yes | No  | Yes | Yes | No  | Yes | Critically low |
| Mishriky, 2014 | Yes      | No          | No  | Partial Yes | Yes | Yes | Partial Yes | Yes         | Yes | No  | Yes | Yes | Yes | Yes | Yes | Yes | Low            |
| Rai, 2017      | Yes      | Yes         | No  | Partial Yes | Yes | Yes | Partial Yes | Yes         | Yes | No  | Yes | Yes | Yes | No  | No  | Yes | Low            |
| Riddell, 2019  | Yes      | Yes         | No  | Yes         | Yes | Yes | Partial Yes | Yes         | Yes | No  | Yes | No  | Yes | Yes | No  | Yes | Low            |
| Verret, 2020   | Yes      | Yes         | No  | Yes         | Yes | Yes | Partial Yes | Yes         | Yes | Yes | Yes | Yes | Yes | Yes | Yes | Yes | High           |
